# Supplementary material for: Fibrinogen Concentrate for the Treatment of Thrombolysis-Associated Hemorrhage in Adult Ischemic Stroke Patients
Source: PubMed Central journal article supplement — Clin Appl Thromb Hemost. 2020 Sep 18;26:1076029620951867. doi: 10.1177/1076029620951867 (PMC7502993; doi:10.1177/1076029620951867), 2020-09-18

**Supplemental Figure E-1:** Institutional Guidelines for the Management of Symptomatic Intracranial Hemorrhage after Administration of rt-PA

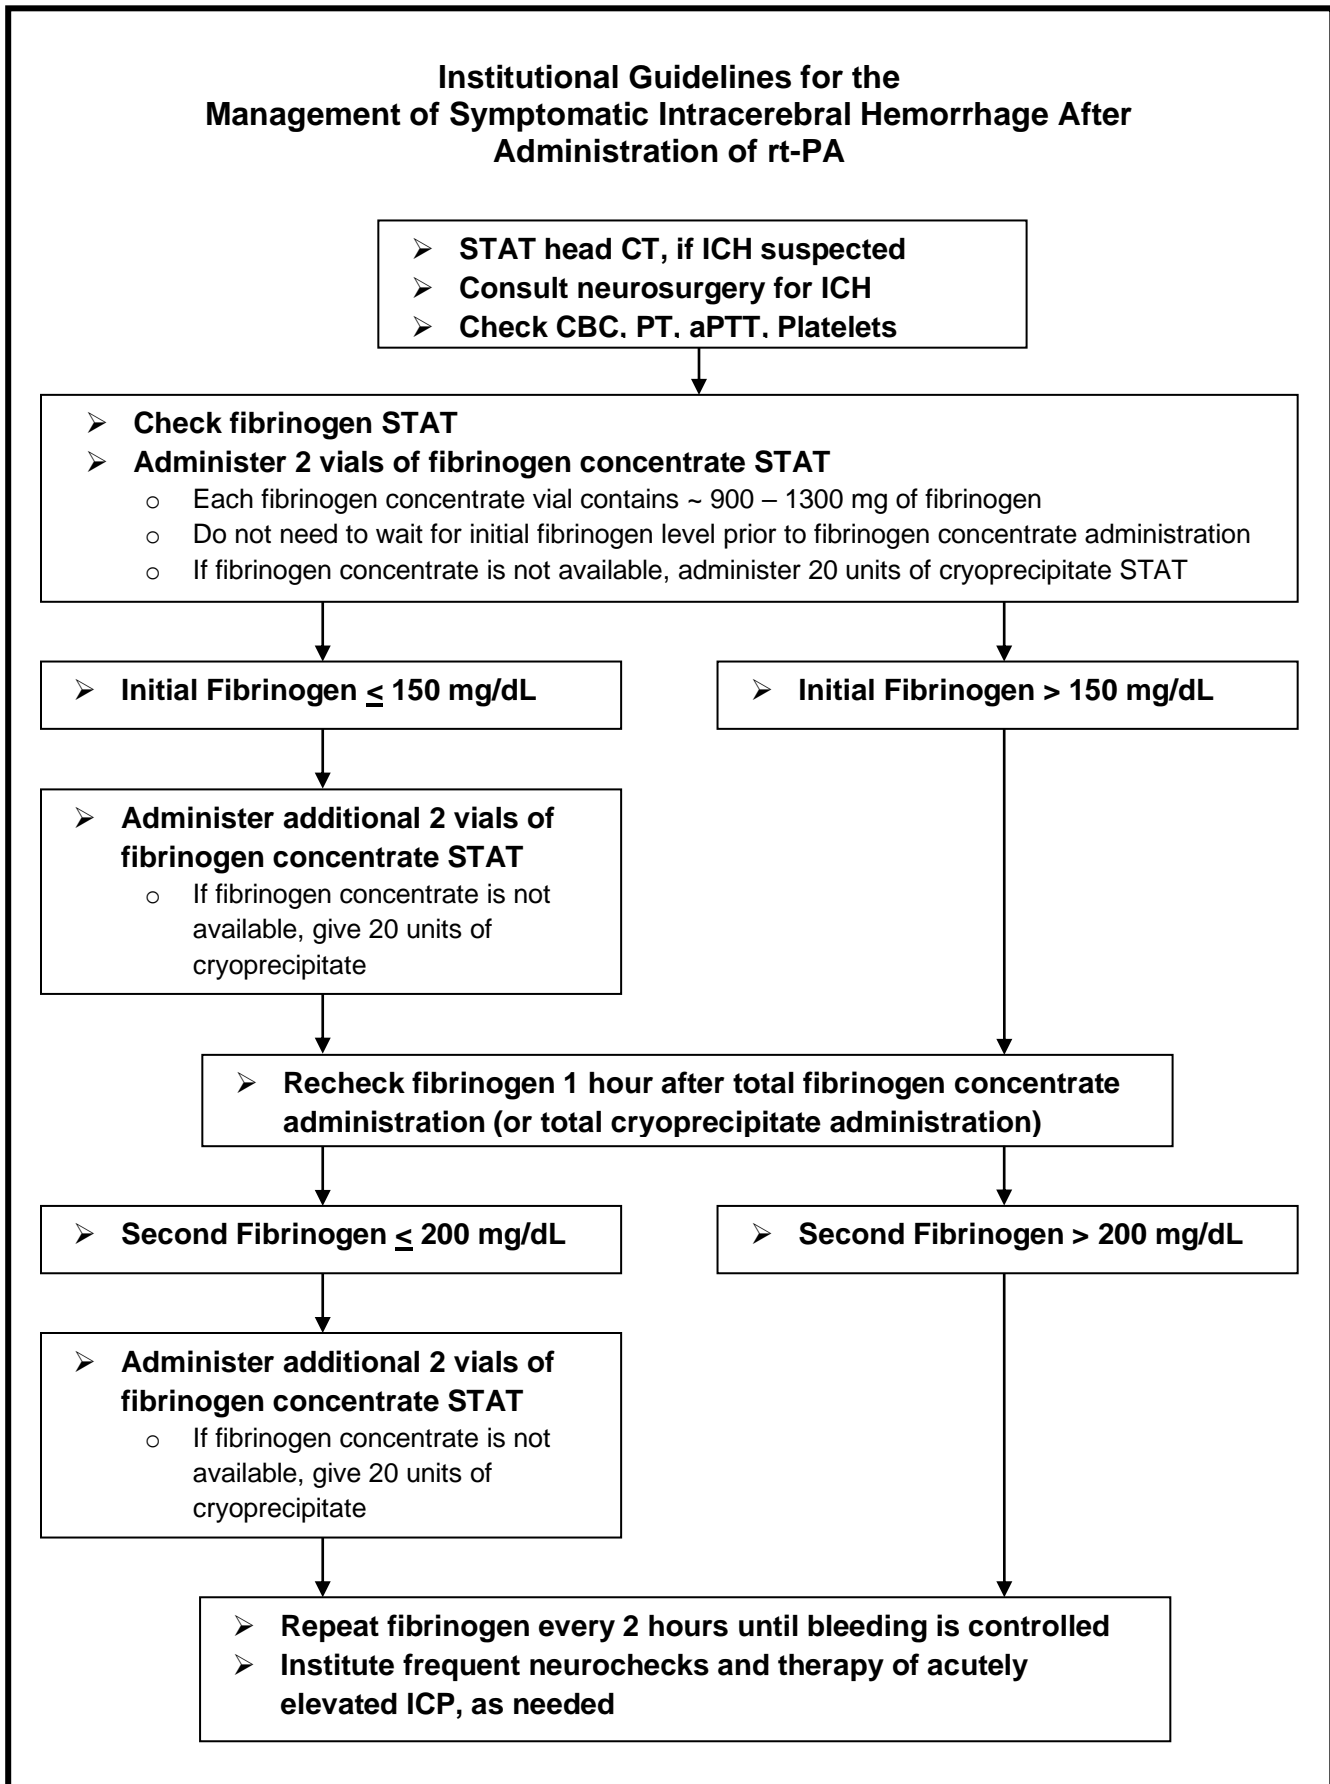

Supplement: MBarra_CATH_Fibrinogen_Concentrate_Supplemental_Figure_1.pdf [file MBarra_CATH_Fibrinogen_Concentrate_Supplemental_Figure_1.pdf]
