# Supplementary material for: Fibrinogen Concentrate for the Treatment of Thrombolysis-Associated Hemorrhage in Adult Ischemic Stroke Patients
Source: PubMed Central journal article supplement — Clin Appl Thromb Hemost. 2020 Sep 18;26:1076029620951867. doi: 10.1177/1076029620951867 (PMC7502993; doi:10.1177/1076029620951867), 2020-09-18
Supplement: MBarra_CATH_Fibrinogen_Concentrate_Supplemental_Table_E1.pdf [file MBarra_CATH_Fibrinogen_Concentrate_Supplemental_Table_E1.pdf]

**Supplemental Table E-2: Coagulation Parameters within 24 hours of Fibrinogen Concentrate Administration**

| Lab Parameter               | Lab Result*                                      | Patient |      |      |      |      |      |      |      |      |      |      |      |      |      |      |      |      |      |      |      |      |    |      |      |
|-----------------------------|--------------------------------------------------|---------|------|------|------|------|------|------|------|------|------|------|------|------|------|------|------|------|------|------|------|------|----|------|------|
|                             |                                                  | 1       | 2    | 3    | 4    | 5    | 6    | 7    | 8    | 9    | 10   | 11   | 12   | 13   | 14   | 15   | 16   | 17   | 18   | 19   | 20   | 21   | 22 | 23   | 24   |
| Baseline Hypofibrinogenemia |                                                  | Yes     | Yes  | No   | No   | Yes  | No   | Yes  | No   | No   | No   | Yes  | No   | Yes  | No   | No   | Yes  | No   | No   | No   | Yes  | NR   | NR | NR   | NR   |
| INR                         | Baseline Post rt-PA / Pre Fibrinogen Concentrate | 1.7     | 1.7  | 1.2  | 1.1  | 1.6  | 1    | 1.63 | 1.2  | 1    | 1.2  | 1.7  | 1.1  | 1.3  | 1.2  | 1.2  | 1.5  | 1.4  | 1.1  | 1.1  | 1.6  | 1.5  | NR | NR   | NR   |
|                             | 1 <sup>st</sup> result                           | 1.4     | 1.6  | 1.1  | 1.2  | 1.2  | 1.2  | 1.4  | 1.2  | 1    | NR   | 1.3  | 1.2  | 1.1  | 1.2  | 1.4  | 1.4  | 1.4  | 1.2  | 1    | 1.4  | 1.2  | NR | 1.7  | 1.4  |
|                             | 2 <sup>nd</sup> result                           | 1.3     | 1.3  | 1.2  | 1.1  | 1.2  |      | 1.3  |      |      |      | 1.4  |      | 1.1  | 1.3  | 1.3  | 1.3  | 1.4  | 1.2  | 1.1  | 1.4  |      |    | 1.2  | 1.3  |
|                             | 3 <sup>rd</sup> result                           | 1.2     | 1.3  |      | 1.2  |      |      |      |      |      |      | 1.3  |      |      | 1    | 1.2  | 1.3  | 1.1  | 1.4  | 1.2  |      |      |    | 1.3  | 1.4  |
|                             | 4 <sup>th</sup> Result                           |         | 1.3  |      | 1.2  |      |      |      |      |      |      |      |      |      | 1.1  |      |      |      |      |      |      |      |    |      | 1.4  |
| aPTT, seconds               | Baseline Post rt-PA / Pre Fibrinogen Concentrate | 37.4    | 33.4 | 29.5 | NR   | 42.3 | 23.9 | 39.4 | 28.1 | 23.2 | 27.4 | 53.6 | 23.3 | NR   | NR   | 30.9 | 62   | 39.8 | 31.5 | NR   | 35.6 | 35.4 | NR | NR   | NR   |
|                             | 1 <sup>st</sup> result                           | 26.4    | 34.3 | 42.2 | 33.5 | 30.9 | 29.6 | 33.9 | 28.1 | 26.8 | NR   | 26   | 26.3 | 26   | 28.7 | 32   | 32.7 | NR   | 31.8 | 23.4 | 27.2 | 28.1 | NR | >150 | 35.9 |
|                             | 2 <sup>nd</sup> result                           | 29.2    | 34.9 | 29.1 | 32   |      |      | 29.8 |      |      |      | 23.3 |      | 26.6 | 29.2 |      | 34.4 |      | 31.2 | 27.5 | 28.1 |      |    | 28.9 | 33.7 |
|                             | 3 <sup>rd</sup> result                           | 29.7    | 31.2 |      | 33.8 |      |      |      |      |      |      | 22.2 |      | 25.2 |      |      | 27.9 |      | 32.7 |      | 27.6 |      |    | 28.5 | 32.4 |
|                             | 4 <sup>th</sup> Result                           |         | 29.8 |      | 33   |      |      |      |      |      |      |      |      | 25.4 |      |      |      |      |      |      |      |      |    | 28.4 | 29.7 |
| PT, seconds                 | Baseline Post rt-PA / Pre Fibrinogen Concentrate | 20.1    | 19.6 | 14.9 | 14.5 | 19.4 | 13.5 | 19.0 | 14.7 | 12.9 | 15.0 | 19.7 | 14.1 | 15.6 | 15.1 | 15.1 | 17.7 | 16.8 | 14.2 | 13.9 | 18.8 | 17.4 | NR | NR   | NR   |
|                             | 1 <sup>st</sup> result                           | 16.9    | 18.7 | 14.3 | 15.5 | 14.9 | 13.5 | 17.0 | NR   | 13.0 | NR   | 16.6 | 14.8 | 13.9 | 15.3 | 16.6 | 16.5 | 17.2 | 14.5 | 13.4 | 17.2 | 15.3 | NR | 20.0 | 16.8 |
|                             | 2 <sup>nd</sup> result                           | 16.1    | 16.4 | 14.7 | 14.5 |      |      | 16.5 |      |      |      | 17.2 |      | 13.8 | 15.5 | 15.8 | 15.9 | 17.2 | 14.9 | 14.5 | 17.2 |      |    | 14.9 | 16.1 |
|                             | 3 <sup>rd</sup> result                           | 15.7    | 16.5 |      | 14.7 |      |      |      |      |      |      | 16.3 |      | 13.4 | 15.3 | 16   | 13.9 | 16.7 | 15.4 |      | 17.4 |      |    | 15.7 | 16.5 |
|                             | 4 <sup>th</sup> result                           |         | 16.0 |      | 15.5 |      |      |      |      |      |      |      |      | 14.0 |      |      |      |      |      |      |      |      |    | 16.6 | 15.0 |

NR – not reported

\*All lab results reported are post fibrinogen concentrate administration unless otherwise noted
